# Supplementary material for: Two-component carnitine monooxygenase from Escherichia coli: functional characterization, inhibition and mutagenesis of the molecular interface
Source: Oxford University Press journal article supplement (doi:10.1042/bsr20221102), 2022-09-01
Supplement: bsr-2022-1102_supp.pdf [file bsr-2022-1102_supp.pdf]

## Supplementary Information

### Two-component carnitine monooxygenase from *Escherichia coli*: Functional characterization, Inhibition and mutagenesis of the molecular interface

Fabian Piskol<sup>1</sup>, Kerstin Neubauer<sup>1</sup>, Maurice Eggers<sup>1</sup>, Lisa Margarete Bode<sup>1</sup>, Jan Jasper<sup>1</sup>, Alan Slusarenko<sup>2</sup>, Edward Reijerse<sup>3</sup>, Wolfgang Lubitz<sup>3</sup>, Dieter Jahn<sup>4</sup> and Jürgen Moser<sup>1</sup>

<sup>1</sup>Institute of Microbiology, Technical University Braunschweig, Braunschweig, Germany

<sup>2</sup>Institut für Biologie III, RWTH Aachen University, Germany

<sup>3</sup>Max-Planck-Institute for Chemical Energy Conversion, Mülheim an der Ruhr, Germany

<sup>4</sup>Braunschweig Centre of Integrated Systems Biology, Braunschweig, Germany

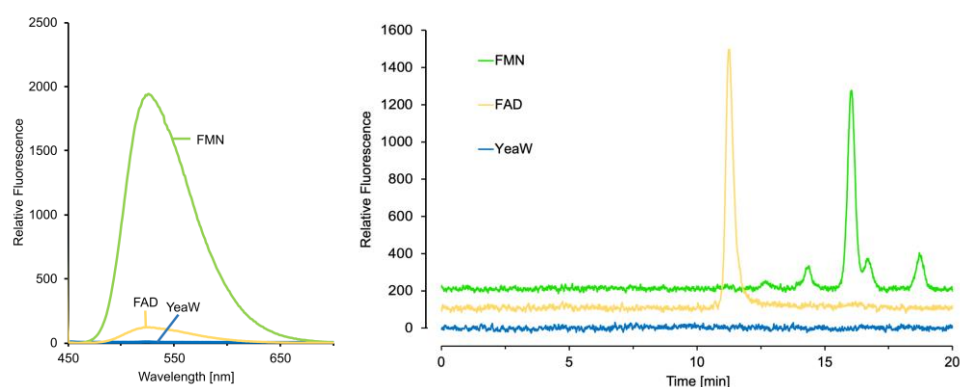

**Figure S1. Fluorescence and HPLC analyses of YeaW.** *left*, fluorescence measurement of a purified YeaW sample (370 nm excitation). Equimolar samples of an FMN or FAD standard were analyzed accordingly. *right*, a purified sample of YeaW (~50  $\mu$ M) in a volume of 300  $\mu$ l was incubated at 99  $^{\circ}$ C for 10 min. The resulting supernatant after centrifugation was chromatographed on a Reprosil 100 C18 column using excitation/emission wavelengths of 370/526 nm (*blue*). Authentic samples of FAD (*yellow*) or FMN (*green*) were analyzed accordingly.

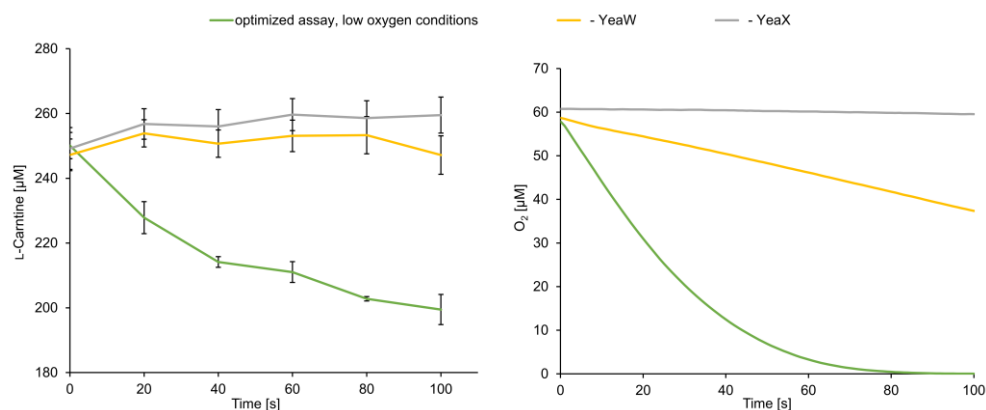

**Figure S2. Carnitine monooxygenase activity under low oxygen conditions.** The L-carnitine depletion assay and the O<sub>2</sub> depletion assay (*green traces*) were performed in an anaerobic chamber using N<sub>2</sub> saturated buffers. Mixtures of oxygen-free and air saturated assay components facilitated for the adjustment of a specific oxygen partial pressure of ~5%. A fiber-optic oxygen meter (FireSting, PyroScience) was used to validated the resulting oxygen values. Control reactions in the absence of YeaW (*yellow traces*) or YeaX (*grey traces*) were performed. *left*, L-carnitine depletion assay (prepared in triplicate, details under experimental procedures). *right*, continuous O<sub>2</sub> depletion assay. One representative graph from three measurements is shown.

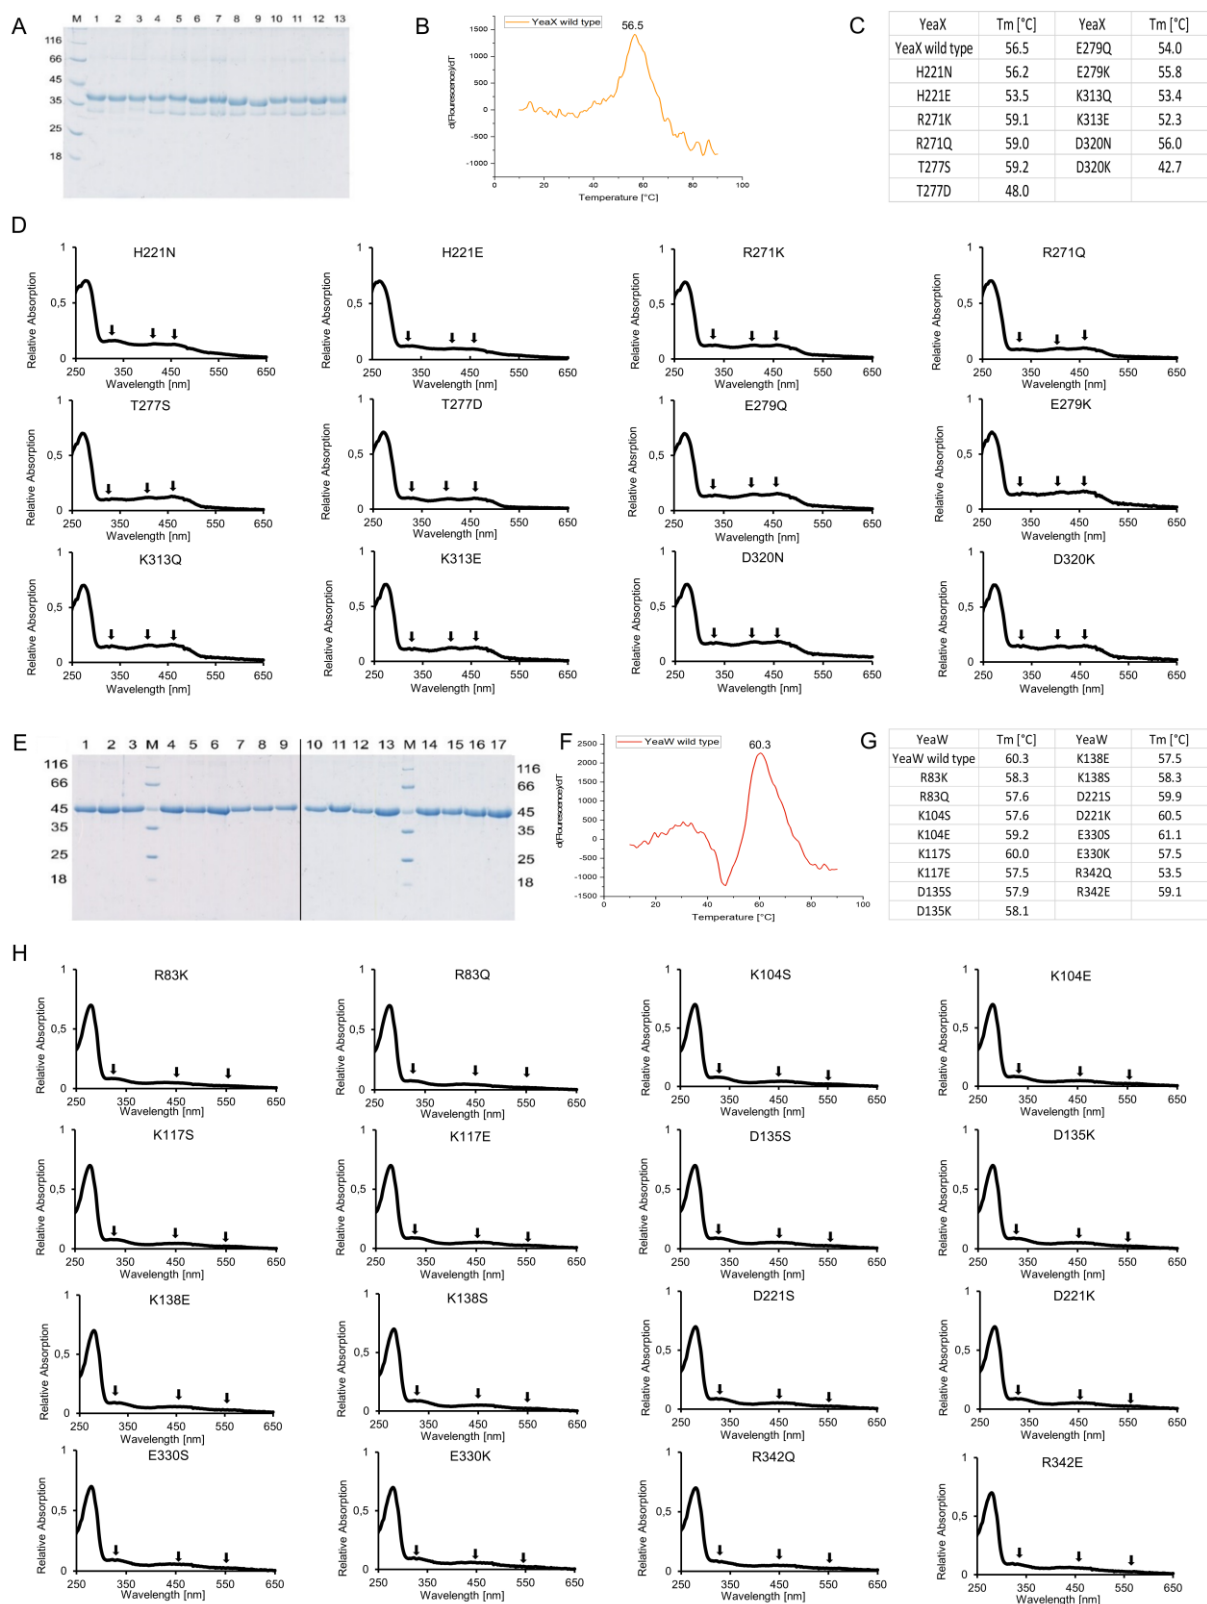

**Figure S3. Characterization of YeaX and YeaW proteins.** **A** and **E**, SDS-PAGE analysis of purified YeaX mutants (lanes 1-13: wild type, H221N, H221E, R271K, R271Q, T277S, T277D, E279Q, E279K, K313Q, K313E, D320N and D320K) and of YeaW variants (lanes 1-17: wild type, R83K, R83Q, K104S, K104E, K117S, K117E, D135S, D135K, K138S, K138E, D221S, D221K, E330S, E330K, R342E and R342Q; lanes M: molecular mass marker, relative molecular masses (x 1,000) are indicated. **B** and **F**, thermal denaturation experiments (Thermofluor assay) for wild type YeaX and YeaW. **C** and **G**, melting temperature of variant proteins of YeaX and YeaW. **D** and **H**, Normalized UV-visible absorption spectra of purified YeaX and YeaW proteins.
